# Supplementary material
Source: PubMed Central journal article supplement (PMC4475669)
Supplement: NIHMS686736-supplement-1.pdf [file NIHMS686736-supplement-1.pdf]

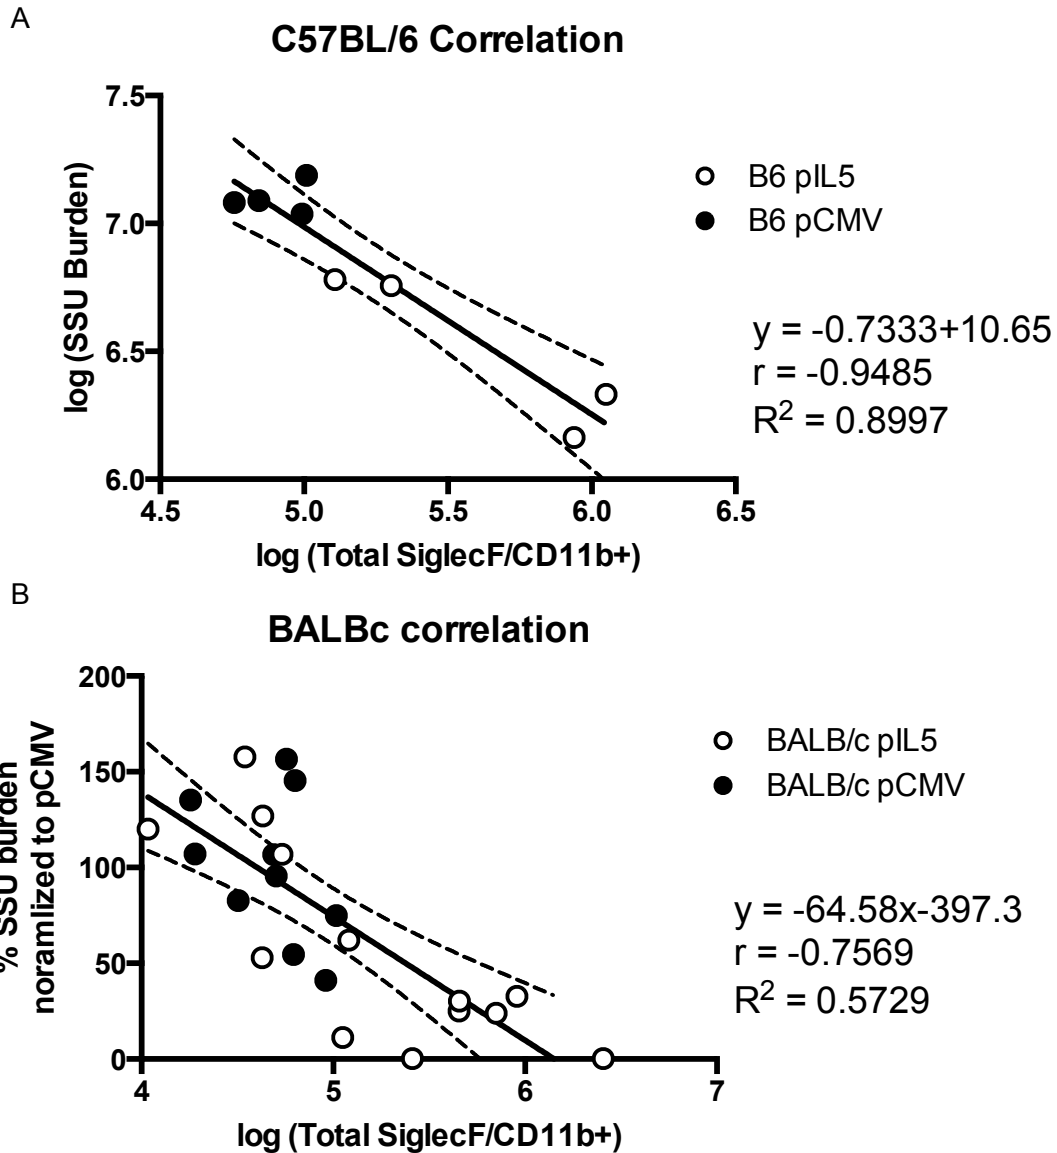

**Supplemental Figure 1: Eosinophil number correlates with *Pneumocystis* killing *in vivo*.** A. Correlation between the log of total SiglecF<sup>+</sup>CD11b<sup>+</sup> cells with the log of *Pneumocystis* SSU burden demonstrates a strong negative correlation in B6 mice. Solid line represents linear regression of data points and dashed lines represent 95% confidence interval ( $r = -0.9485$ ,  $p = 0.0003$  by Pearson's correlation). B. Similar correlation was noted in BALB/c mice while four pIL5-treated mice recruited fewer eosinophils and had minimal decreases in *Pneumocystis* burden ( $r = -0.7569$ ,  $p < 0.0001$  by Pearson's correlation).

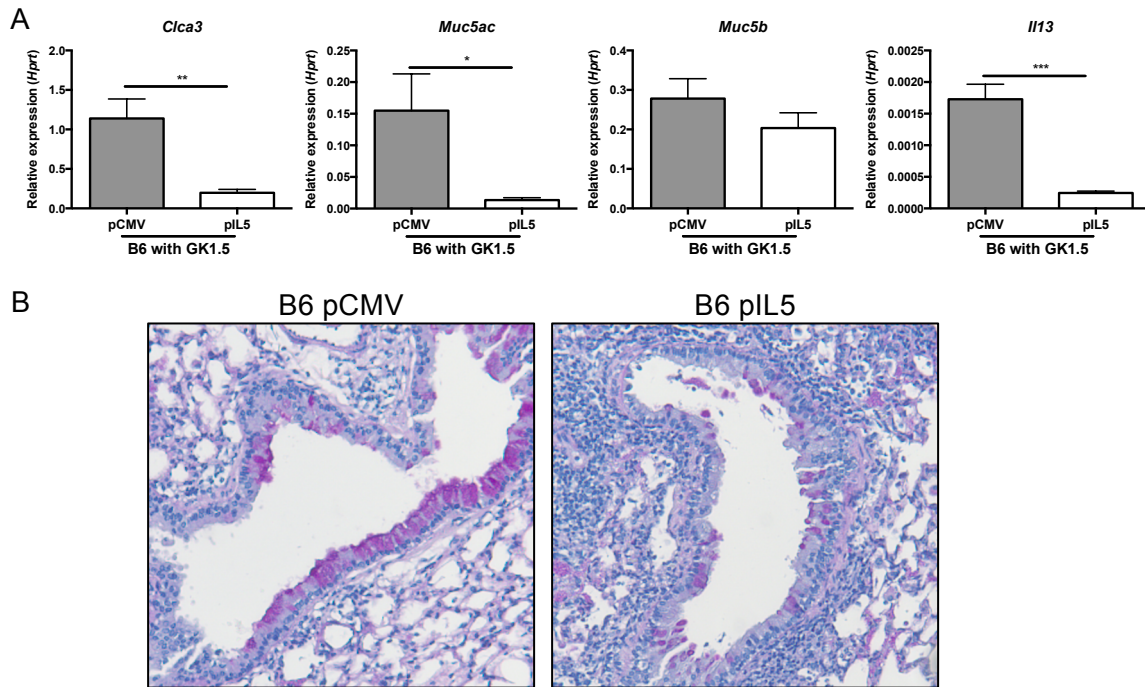

**Supplemental Figure 2: Airway markers of pathology are reduced following pIL5 treatment.** A. pIL5 treatment in B6 mice resulted in reduced *Clca3*, *Muc5ac*, and *Il13* expression in whole lung homogenate when compared to pCMV treated mice (\*, \*\*, and \*\*\* represent  $p < 0.05$ ,  $p < 0.01$ ,  $p < 0.005$  by student's T test). *Muc5b* expression was not significantly different in pIL5 treated animals. B. PAS staining of airways shows reduced mucus production in pIL5 treated B6 mice when compared to mice receiving pCMV at 10X magnification.
